# Supplementary material for: A tandem approach for waste-to-nanomaterial transformation towards polyethylene recycling
Source: Royal Society of Chemistry journal article supplement (doi:10.1039/d5su00861a), 2025-12-19
Supplement: d5su00861a1.pdf [file d5su00861a1.pdf]

# Tectonic approach for waste-to-nanomaterial transformation towards polyethylene recycling

*Yanan Huang,<sup>a</sup> Chi-Linh Do-Thanh,<sup>b</sup> Zhenzhen Yang,<sup>\*c</sup> Sheng Dai,<sup>\*b,c</sup> Hao Chen,<sup>\*a,b</sup>*

<sup>a</sup> State Key Laboratory for Chemo and Biosensing, College of Chemistry and Chemical Engineering, Hunan University, Changsha, 410082, China.

<sup>b</sup> Department of Chemistry, Institute for Advanced Materials and Manufacturing, University of Tennessee, Knoxville, TN 37996, USA.

<sup>c</sup> Chemical Sciences Division, Oak Ridge National Laboratory, Oak Ridge, TN 37831, USA.

\* Corresponding author.

E-mail address: [chenhaoch@hnu.edu.cn](mailto:chenhaoch@hnu.edu.cn) (H. Chen), [yangz3@ornl.gov](mailto:yangz3@ornl.gov) (Z. Yang), [dais@ornl.gov](mailto:dais@ornl.gov) (S. Dai)

## Table of contents

|                                                                                                                                                                                                                                                                                                                                                                                                                      |    |
|----------------------------------------------------------------------------------------------------------------------------------------------------------------------------------------------------------------------------------------------------------------------------------------------------------------------------------------------------------------------------------------------------------------------|----|
| Table of contents .....                                                                                                                                                                                                                                                                                                                                                                                              | 2  |
| Materials .....                                                                                                                                                                                                                                                                                                                                                                                                      | 4  |
| Characterization.....                                                                                                                                                                                                                                                                                                                                                                                                | 4  |
| Synthesis procedure.....                                                                                                                                                                                                                                                                                                                                                                                             | 5  |
| Calculation of CO <sub>2</sub> /N <sub>2</sub> selectivity .....                                                                                                                                                                                                                                                                                                                                                     | 5  |
| Calculation of Q <sub>st</sub> .....                                                                                                                                                                                                                                                                                                                                                                                 | 5  |
| CV measurement .....                                                                                                                                                                                                                                                                                                                                                                                                 | 6  |
| Supplementary figures and tables.....                                                                                                                                                                                                                                                                                                                                                                                | 7  |
| Figure S1 (A) Thermogravimetric analysis (TGA) result of PE precursor (molecular weight: 3000) obtained under N <sub>2</sub> atmosphere with a ramping rate of 10 ° C min <sup>-1</sup> . (B) SEM images showing the morphology of the PE precursor. (C) N <sub>2</sub> adsorption – desorption isotherms of the PE precursor. (D) Pore size distribution of the PE precursor derived from the adsorption data. .... | 7  |
| Figure S2 N <sub>2</sub> isotherms (77K) of the carbon materials obtained at 850 ° C with different mass ratio of NaNH <sub>2</sub> :PE.....                                                                                                                                                                                                                                                                         | 8  |
| Figure S3 N <sub>2</sub> isotherms (77K) of the carbon materials obtained at the NaNH <sub>2</sub> :PE mass ratio of 0.25 and different reaction temperatures. ....                                                                                                                                                                                                                                                  | 8  |
| Figure S4 Raman spectra of C-0.1-850, C-0.25-850 and C-0.5-850. ....                                                                                                                                                                                                                                                                                                                                                 | 9  |
| Figure S5 TGA analysis of C-0.1-850, C-0.25-850 and C-0.5-850 .....                                                                                                                                                                                                                                                                                                                                                  | 9  |
| Figure S6 PXRD pattern of the PE precursor and the C-0.25-850 obtained with a NaNH <sub>2</sub> :PE mass ratio of 0.25 and reaction temperature of 850 ° C.....                                                                                                                                                                                                                                                      | 10 |
| Figure S7 FTIR spectra of the PE precursor and the C-0.25-850 obtained with a NaNH <sub>2</sub> :PE mass ratio of 0.25 and reaction temperature of 850 ° C.....                                                                                                                                                                                                                                                      | 10 |
| Figure S8 PXRD pattern of C' -0.25-850 obtained with a NaNH <sub>2</sub> :PE35000 mass ratio of 0.25 and reaction temperature of 850 ° C. ....                                                                                                                                                                                                                                                                       | 11 |
| Figure S9 FTIR spectrum of C' -0.25-850 obtained with a NaNH <sub>2</sub> :PE35000 mass ratio of 0.25 and reaction temperature of 850 ° C. ....                                                                                                                                                                                                                                                                      | 11 |
| Table S1 surface area of the carbon materials fabricated in this work and previous literature using PE as the precursor. ....                                                                                                                                                                                                                                                                                        | 13 |

|                                                                                                              |    |
|--------------------------------------------------------------------------------------------------------------|----|
| Table S2 CO <sub>2</sub> uptake performance of the carbons derived from PE and data from the literature..... | 14 |
| Reference.....                                                                                               | 15 |

## Materials

All reagents and solvents [Polyethylene (M=3000, 35000; Aldrich, USA), Sodium amide ( $\text{NaNH}_2$ , AR, Fisher Scientific, USA)] were purchased from commercial sources and were used without further purification, unless indicated otherwise.

## Characterization

The powder X-ray diffraction (PXRD) data were recorded with a PANalytical Empyrean diffractometer, operated at 45 kV and 40 mA (scanning step:  $0.02^\circ$  per step). The diffraction patterns were recorded in the range of  $5\text{--}60^\circ$ .  $\lambda = 0.1540598$  nm. Field emission scanning electron microscopy (SEM) observations were performed on a Hitachi S-4800 microscope operated at an accelerating voltage of 15.0 kV. Transmission electron microscopy (TEM) were conducted on an aberration-corrected FEI Titan S 80-300. FTIR spectra of the samples were collected on a TENSOR 27 FTIR at a resolution of  $2\text{ cm}^{-1}$ . X-ray photoelectron spectroscopy (XPS) was performed with a Thermo Scientific Model K-Alpha XPS Instrument. The instrument uses micro-focused, monochromatic Al  $K\alpha$  X-rays (1486.6 eV). The X-ray spot can be focused to a range of spot sizes from 30 to 400 microns. Thermogravimetric analyses (TGA) were performed under air on a SII Nanotechnology TGA 2950, with a heating rate of  $10\text{ }^\circ\text{C min}^{-1}$ . The nitrogen adsorption and desorption isotherms were measured at 77 K under a Gemini 2360 surface area analyzer. The samples were outgassed at  $150\text{ }^\circ\text{C}$  for 16 h before the measurements. Surface areas were calculated from the adsorption data using Brunauer–Emmett–Teller (BET) methods. The pore-size-distribution curves were obtained from the adsorption branches using non-local density functional theory (NLDFT) method. The  $\text{CO}_2$  adsorption and desorption isotherms were measured at 273 and 298 K by Autosorb-1-C Quantachrome analyzer. Elemental analyses were performed by Atlantic Microlab Inc., Norcross, GA.

## Synthesis procedure

A mixture composed of NaNH<sub>2</sub> (0.1–0.75 g) and polyethylene (1 g) was placed in a nickel crucible and then heated in a tubular furnace under flowing N<sub>2</sub> (100 mL/min) to a target temperature of 500 °C with ramping rate of 5 °C/min, keeping the temperature for 1 h, and then further increased to 650–850 °C, keeping for 2 h (The corresponding molar ratios of NaNH<sub>2</sub> to the –CH<sub>2</sub>–CH<sub>2</sub>– repeat unit were calculated to be 0.072, 0.18, 0.36, and 0.54 for NaNH<sub>2</sub> loadings of 0.10, 0.25, 0.50, and 0.75 g per 1 g of PE, respectively). The resultant powder was washed with deionized water to neutral, followed by being dried at 120 °C for 12 h. The obtained carbon was named as C-M-N, (M refers to the ratio of NaNH<sub>2</sub>/Polyethylene, N refers to the heating temperature). Yield of carbon = (Mass of carbon obtained)/(Mass of polyethylene in the starting material).

## Calculation of CO<sub>2</sub>/N<sub>2</sub> selectivity

The isotherm data for CO<sub>2</sub> and N<sub>2</sub> were fitted with the dual-site Langmuir-Freundlich model as follows.

$$q = q_{A, sat} \frac{b_A p^{v_A}}{1 + b_A p} + q_{B, sat} \frac{b_B p^{v_B}}{1 + b_B p}$$

where  $p$  is the pressure of the bulk gas at equilibrium with the adsorbed phase (kPa),  $q$  is the adsorbed amount per mass of adsorbent (mol kg<sup>-1</sup>),  $q_{A, sat}$  and  $q_{B, sat}$  are the saturation capacities of site A and B (mmol g<sup>-1</sup>),  $b_A$  and  $b_B$  are the affinity coefficients (kPa<sup>-1</sup>),  $v_A$  and  $v_B$  represent the deviations from an ideal homogeneous surface.

## Calculation of $Q_{st}$

The isosteric heats of adsorption ( $Q_{st}$ ) was used to explore the binding energy of C<sub>3</sub>H<sub>4</sub>, which is defined as follows,

$$Q_{st} = -R \sum_{i=0}^m a_i N^i$$

The calculations were based on the Virial equations fitted by isotherms of two different temperatures (298 and 273 K).

$$\ln p = \ln N + \frac{1}{T} \sum_{i=0}^m a_i N^i + \sum_{i=0}^m b_i N^i$$

where  $p$  (bar) is the pressure of the bulk gas at equilibrium with the adsorbed phase,  $N$  (mmol g<sup>-1</sup>) is the adsorbed amount per mass of adsorbent,  $T$  (K) is the test temperature, while  $a_i$  (i=1-5) and  $b_i$  (i=1-3) are the Virial constants.

### CV measurement

A three-electrode system was used to evaluate the capacitive performance of the as-prepared porous carbons by NaNH<sub>2</sub>-promoted cross-linking/carbonization on a CHI 760C electrochemical workstation (Shanghai ChenHua Instruments Co., China). The test was performed in 1M H<sub>2</sub>SO<sub>4</sub> aqueous solution with a platinum foil and Ag/AgCl (1 M KCl) as the counter electrode and reference electrode, respectively. The working electrodes were prepared by casting the 10 μL sample ink onto a glass carbon electrode and the sample ink was prepared by 14 mg carbon samples, 4 mg carbon black, 1mL isopropanol with 40 μL Nafion solution (5%) as binder with the aid of sonification for 1 hour. The capacitive performance of samples was studied by using cyclic voltammetry (CV), galvanostatic charge–discharge (GCD) in the voltage range of –0.2 V–0.8 V to avoid H<sub>2</sub>O decomposition. The gravimetric capacitances (C, F/g) based on CV curves and GCD curves were calculated from Equation (1) and Equation (2), respectively.

$$(1) C = \frac{\int_{-0.2}^{0.8} I(V)dV}{2mVS}; (2) C = \frac{It}{mV}$$

Where  $I$  is the discharge current (A),  $m$  is the mass of electrode active materials (g),  $S$  is the scan rate (V/s),  $V$  is the voltage window (V) and  $t$  is the discharging time (s).

## Supplementary figures and tables

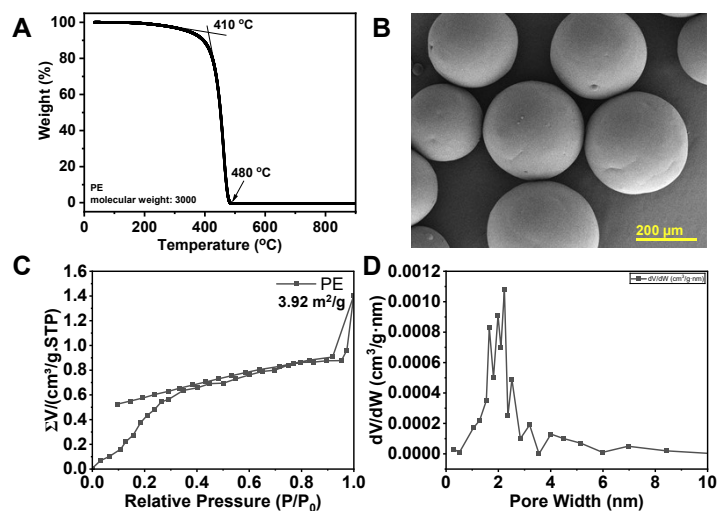

**Figure S1 (A) Thermogravimetric analysis (TGA) result of PE precursor (molecular weight: 3000) obtained under N<sub>2</sub> atmosphere with a ramping rate of 10 °C min<sup>-1</sup>. (B) SEM images showing the morphology of the PE precursor. (C) N<sub>2</sub> adsorption-desorption isotherms of the PE precursor. (D) Pore size distribution of the PE precursor derived from the adsorption data.**

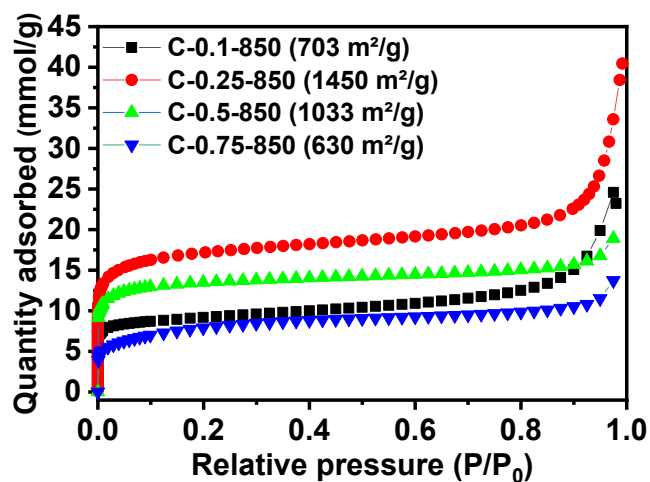

Figure S2 N<sub>2</sub> isotherms (77K) of the carbon materials obtained at 850 °C with different mass ratio of NaNH<sub>2</sub>:PE.

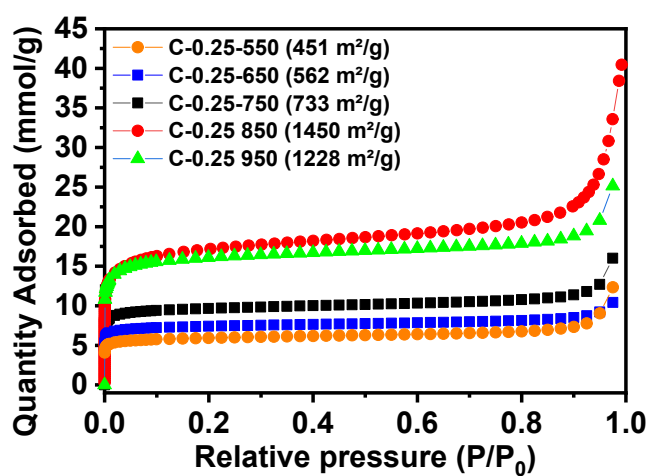

Figure S3 N<sub>2</sub> isotherms (77K) of the carbon materials obtained at the NaNH<sub>2</sub>:PE mass ratio of 0.25 and different reaction temperatures.



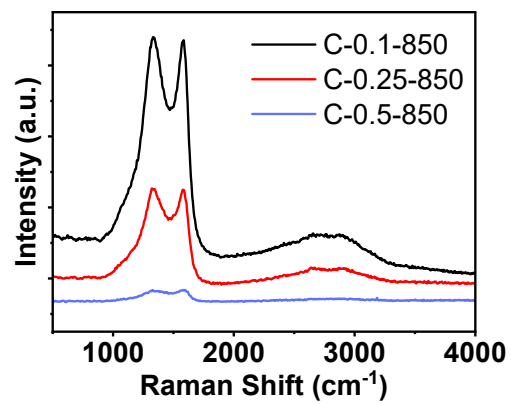

Figure S4 Raman spectra of C-0.1-850, C-0.25-850 and C-0.5-850.

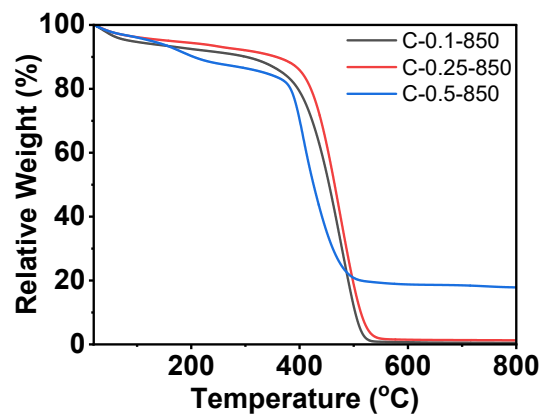

Figure S5 TGA analysis of C-0.1-850, C-0.25-850 and C-0.5-850.

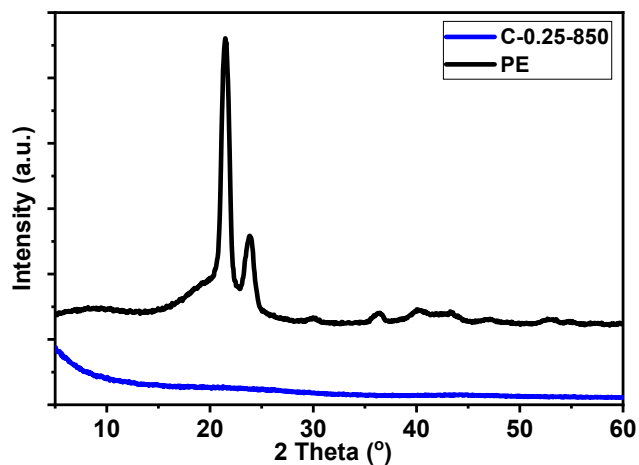

Figure S6 PXRD pattern of the PE precursor and the C-0.25-850 obtained with a  $\text{NaNH}_2$ :PE mass ratio of 0.25 and reaction temperature of 850 °C.

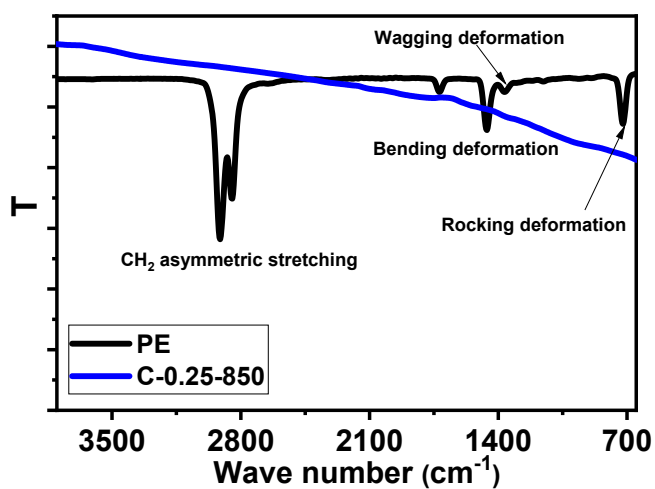

Figure S7 FTIR spectra of the PE precursor and the C-0.25-850 obtained with a  $\text{NaNH}_2$ :PE mass ratio of 0.25 and reaction temperature of 850 °C.

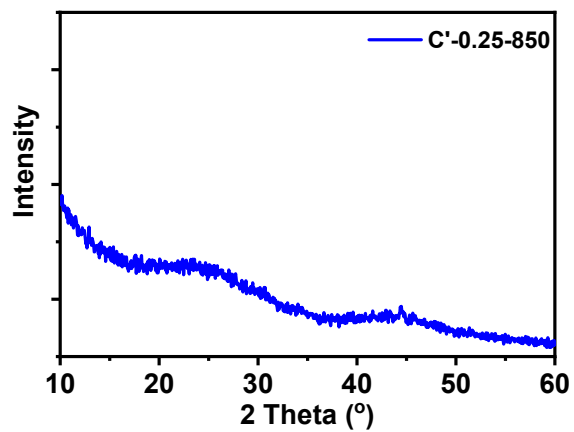

Figure S8 PXRD pattern of C'-0.25-850 obtained with a  $\text{NaNH}_2$ :PE35000 mass ratio of 0.25 and reaction temperature of 850 °C.

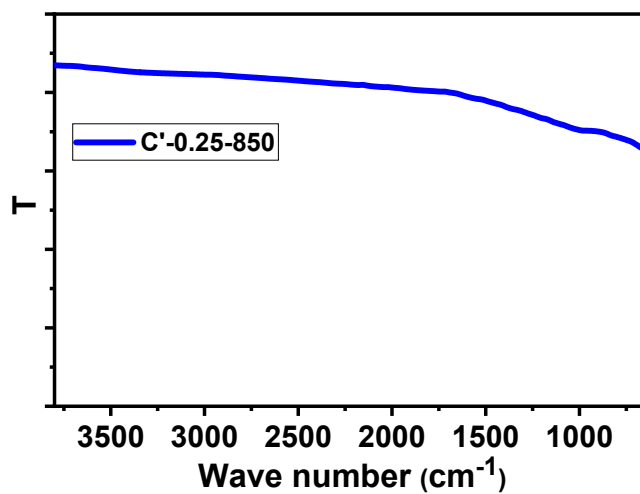

Figure S9 FTIR spectrum of C'-0.25-850 obtained with a  $\text{NaNH}_2$ :PE35000 mass ratio of 0.25 and reaction temperature of 850 °C.

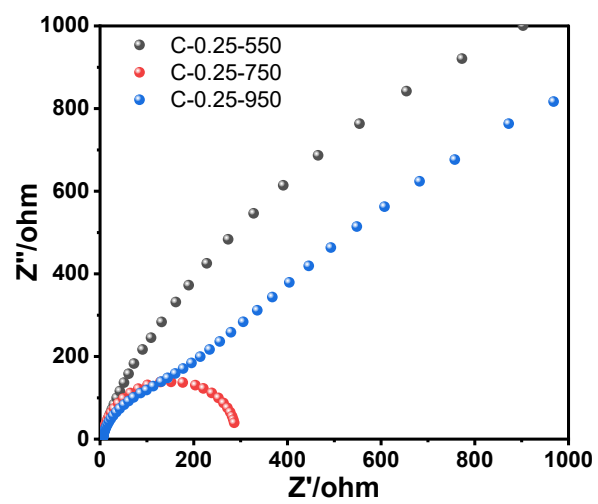

**Figure S10. EIS measurements of C-0.25-550, C-0.25-750, and C-0.25-950.**

**Table S1 surface area of the carbon materials fabricated in this work and previous literature using PE as the precursor.**

| Carbon materials                                                         | Catalyst/activator                   | Temperature<br>[°C] | Surface area<br>[m <sup>2</sup> g <sup>-1</sup> ] | Ref.      |
|--------------------------------------------------------------------------|--------------------------------------|---------------------|---------------------------------------------------|-----------|
| C-0.25-850                                                               | NaNH <sub>2</sub>                    | 850                 | 1450                                              | This work |
| C'-0.25-850                                                              | NaNH <sub>2</sub>                    | 850                 | 2080                                              | This work |
| PE-PC                                                                    | MCHP <sup>[a]</sup>                  | 900                 | 255                                               | 1         |
| PE-HPC                                                                   | MCHP <sup>[a]</sup>                  | 900                 | 767                                               | 1         |
| PE-HPC-800NH <sub>3</sub>                                                | MCHP <sup>[a]</sup> -NH <sub>3</sub> | 900-800             | 1117                                              | 1         |
| PE-HPC-900NH <sub>3</sub>                                                | MCHP <sup>[a]</sup> -NH <sub>3</sub> | 900-900             | 1219                                              | 1         |
| PE-HPC-1000NH <sub>3</sub>                                               | MCHP <sup>[a]</sup> -NH <sub>3</sub> | 900-1000            | 1012                                              | 1         |
| CNT                                                                      | Co(NO <sub>3</sub> ) <sub>2</sub>    | 500                 | 195.7                                             | 2         |
| [a] MCHP was 4MgCO <sub>3</sub> ·Mg(OH) <sub>2</sub> ·5H <sub>2</sub> O. |                                      |                     |                                                   |           |

**Table S2 CO<sub>2</sub> uptake performance of the carbons derived from PE and data from the literature.**

| Carbon materials           | Surface area [m <sup>2</sup> g <sup>-1</sup> ] | CO <sub>2</sub> uptake capacity [mmol g <sup>-1</sup> ] |              | Reference |
|----------------------------|------------------------------------------------|---------------------------------------------------------|--------------|-----------|
|                            |                                                | 273 K, 1 bar                                            | 298 K, 1 bar |           |
| C-0.1-850                  | 703                                            | 5.15                                                    | 3.53         | This work |
| C-0.25-850                 | 1450                                           | 5.31                                                    | 3.31         | This work |
| C-0.5-850                  | 1033                                           | 4.54                                                    | 3.05         | This work |
| C-0.75-850                 | 630                                            | 1.78                                                    | 1.15         | This work |
| C-0.25-550                 | 450                                            | 3.29                                                    | 2.61         | This work |
| C-0.25-650                 | 562                                            | 3.43                                                    | 2.76         | This work |
| C-0.25-750                 | 733                                            | 5.15                                                    | 3.75         | This work |
| C-0.25-950                 | 1228                                           | 4.89                                                    | 3.71         | This work |
| C'-0.25-850                | 2080                                           | 5.21                                                    | 3.53         | This work |
| MC600                      | 479                                            | ~2.0                                                    | ~1.3         | 3         |
| NMC600-330-1h              | 907                                            | 3.97                                                    | ~2.6         | 3         |
| CBAP-1                     | 865                                            | 3.20                                                    | 2.20         | 4         |
| c-CBAP-1N                  | 1063                                           | 5.09                                                    | 3.50         | 4         |
| Palm kernel shell          | 367.8                                          |                                                         | 2.13         | 5         |
| Norit® SX2                 | 660.7                                          |                                                         | 1.88         | 5         |
| PAC2                       | 167.08                                         |                                                         | 1.66 (303K)  | 6         |
| TC-EMC                     | 3840                                           |                                                         | 3.2          | 7         |
| N-TC-EMC                   | 2559                                           |                                                         | 4.00         | 7         |
| N-TC-Y1                    | 1762                                           |                                                         | 3.20         | 7         |
| GSK0.5-700                 | 1714                                           | 4.74                                                    | 3.28         | 8         |
| SK-700                     | 714                                            | 3.02                                                    | 2.81         | 8         |
| HMT-80-1000                | 936                                            | 5.50                                                    | 4.00         | 9         |
| MCN/C                      | 338                                            | 3.05                                                    | 2.35         | 10        |
| HCM_DAH-1                  | 670                                            | 3.30                                                    | 2.60         | 11        |
| HCM-DAH-1-900-3            | 1392                                           | 4.90                                                    | 3.30         | 11        |
| H-NMC-2.5 <sup>[a]</sup>   | 537                                            |                                                         | 2.80         | 12        |
| RFL-500 <sup>[a]</sup>     | 467                                            |                                                         | 3.1          | 13        |
| NMC-His-700 <sup>[a]</sup> | 1114                                           | 3.30                                                    | ~1.80        | 14        |
| NMC-His-900 <sup>[a]</sup> | 1225                                           | 3.60                                                    | ~2.20        | 14        |
| NOMC-800 <sup>[a]</sup>    | 631                                            | 3.20                                                    | 2.90         | 15        |

|                           |      |      |      |    |
|---------------------------|------|------|------|----|
| NOMC-800-K <sup>[a]</sup> | 1413 | 4.60 | 3.10 | 15 |
| CMC-1 <sup>[a]</sup>      | 1082 | 4.80 | 3.20 | 16 |
| CMC-2 <sup>[a]</sup>      | 1994 | 4.84 | 3.08 | 16 |
| CMC-3 <sup>[a]</sup>      | 1405 | 6.27 | 5.22 | 16 |
| CK-600-3 <sup>[a]</sup>   | 1383 | 6.00 | 4.0  | 17 |
| NGC-650-4 <sup>[a]</sup>  | 1824 | 6.23 | 3.92 | 18 |

[a] Nitrogen-doped carbon.

## Reference

- 1 Y. Lian; M. Ni; Z. Huang; R. Chen; L. Zhou; W. Utetiwabo; W. Yang. *Chem Eng J* 2019, **366**, 313-320.
- 2 Z. Huang; Y. Zheng; H. Zhang; F. Li; Y. Zeng; Q. Jia; J. Zhang; J. Li; S. Zhang. *J Mater Sci Technol* 2021, **94**, 90-98.
- 3 K. Huang; S.-H. Chai; R. T. Mayes; G. M. Veith; K. L. Browning; M. A. Sakwa-Novak; M. E. Potter; C. W. Jones; Y.-T. Wu; S. Dai. *Chem Commun* 2015, **51** (97), 17261-17264.
- 4 P. Puthiaraj; Y.-R. Lee; W.-S. Ahn. *Chem Eng J* 2017, **319**, 65-74.
- 5 N. A. Rashidi; S. Yusup. *Journal of Cleaner Production* 2017, **168**, 474-486.
- 6 N. S. Nasri; U. D. Hamza; S. N. Ismail; M. M. Ahmed; R. Mohsin. *Journal of Cleaner Production* 2014, **71**, 148-157.
- 7 L. Wang; R. T. Yang. *The Journal of Physical Chemistry C* 2012, **116** (1), 1099-1106.
- 8 A. Alabadi; S. Razzaque; Y. Yang; S. Chen; B. Tan. *Chem Eng J* 2015, **281**, 606-612.
- 9 L. Liu; Q.-F. Deng; X.-X. Hou; Z.-Y. Yuan. *J Mater Chem* 2012, **22** (31), 15540-15548.
- 10 Q.-F. Deng; L. Liu; X.-Z. Lin; G. Du; Y. Liu; Z.-Y. Yuan. *Chem Eng J* 2012, **203**, 63-70.
- 11 G.-P. Hao; W.-C. Li; D. Qian; G.-H. Wang; W.-P. Zhang; T. Zhang; A.-Q. Wang; F. Schüth; H.-J. Bongard; A.-H. Lu. *J Am Chem Soc* 2011, **133** (29), 11378-11388.
- 12 J. Wei; D. Zhou; Z. Sun; Y. Deng; Y. Xia; D. Zhao. *Adv Funct Mater* 2013, **23** (18), 2322-2328.
- 13 G. P. Hao; W. C. Li; D. Qian; A. H. Lu. *Adv Mater* 2010, **22** (7), 853-857.
- 14 X. Gao; Z. Chen; Y. Yao; M. Zhou; Y. Liu; J. Wang; W. D. Wu; X. D. Chen; Z. Wu; D. Zhao. *Adv Funct Mater* 2016, **26** (36), 6649-6661.
- 15 J. Yu; M. Guo; F. Muhammad; A. Wang; G. Yu; H. Ma; G. Zhu. *Micropor Mesopor Mater* 2014, **190**, 117-127.
- 16 Y. Boyjoo; Y. Cheng; H. Zhong; H. Tian; J. Pan; V. K. Pareek; J.-F. Lamonier; M. Jaroniec; J. Liu. *Carbon* 2017, **116**, 490-499.
- 17 L. Yue; Q. Xia; L. Wang; L. Wang; H. DaCosta; J. Yang; X. Hu. *J Colloid Interface Sci* 2018, **511**, 259-267.
- 18 L. Yue; L. Rao; L. Wang; L. An; C. Hou; C. Ma; H. DaCosta; X. Hu. *Energ Fuel* 2018, **32** (6), 6955-6963.
